# Supplementary material for: Integrating Statistical Predictions and Experimental Verifications for Enhancing Protein-Chemical Interaction Predictions in Virtual Screening
Source: PLoS Comput Biol. 2009 Jun 5;5(6):e1000397. doi: 10.1371/journal.pcbi.1000397 (PMC2685987; doi:10.1371/journal.pcbi.1000397)
Supplement: Figure S5 — The scope of the third computational prediction. (0.01 MB PDF) [file pcbi.1000397.s006.pdf]

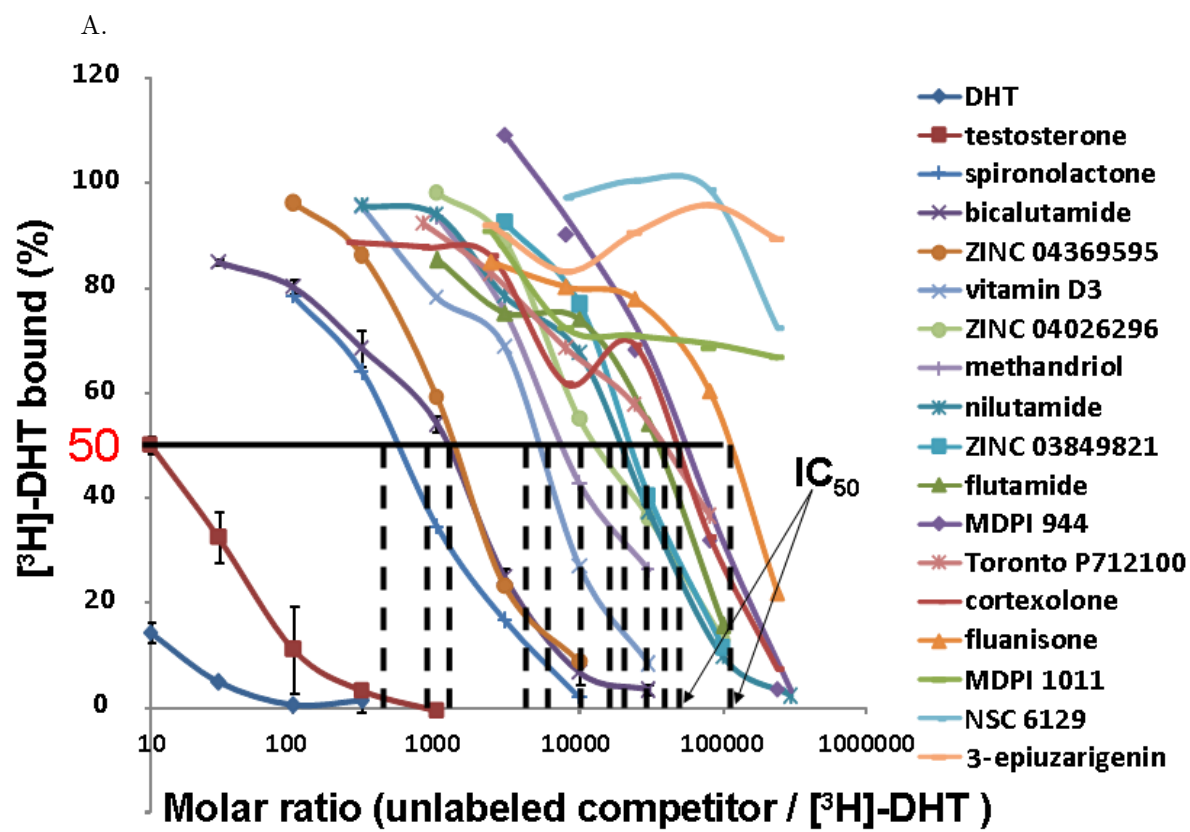

Fig. S4 A: results of the first *in vitro* binding assay.

**(First experimental verification)**I. *In vitro* binding assay of DHT and testosterone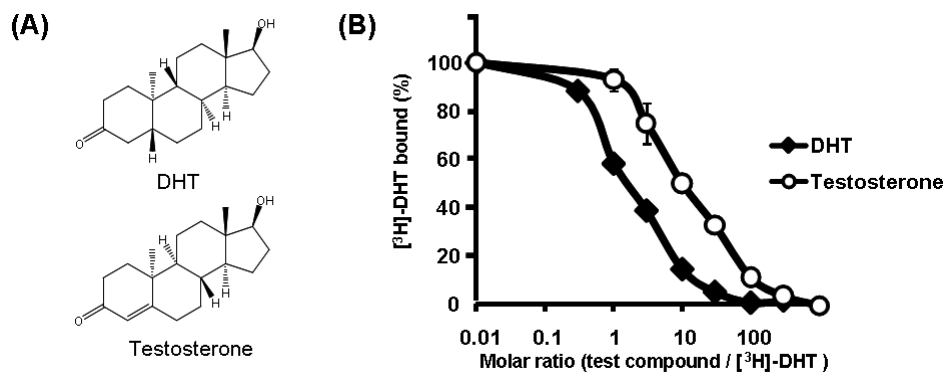

(A) chemical structure of dihydrotestosterone (DHT) and testosterone. (B) result of *in vitro* assay.

II. *In vitro* binding assay of flutamide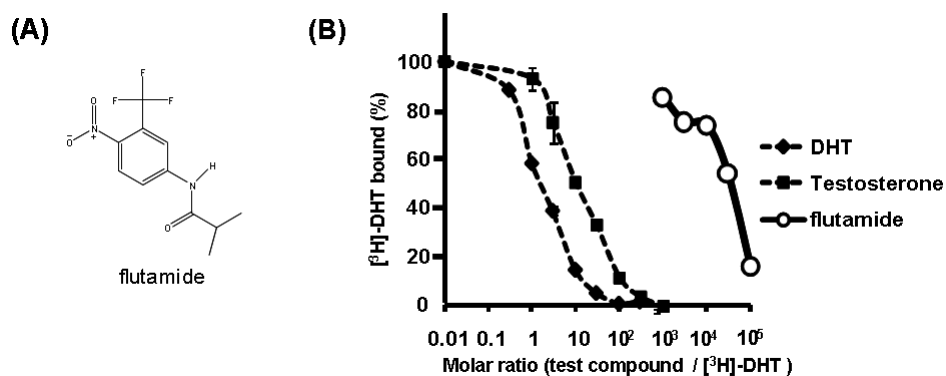

(A) chemical structure of flutamide. (B) result of *in vitro* assay.

III. *In vitro* binding assay of bicalutamide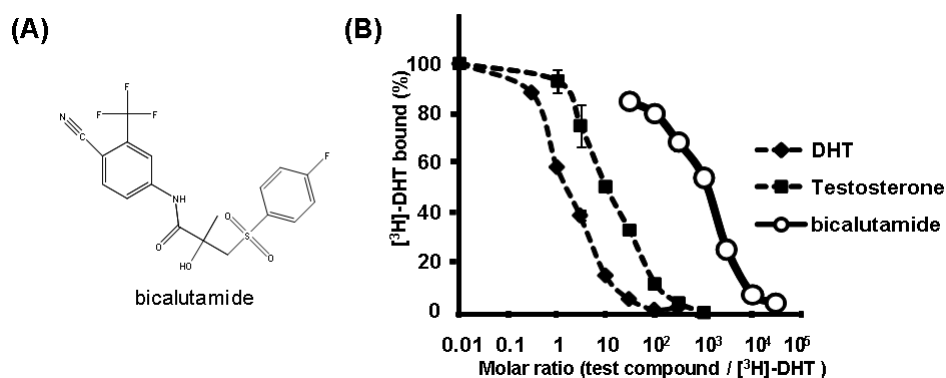

(A) chemical structure of bicalutamide. (B) result of *in vitro* assay.

IV. *In vitro* binding assay of nilutamide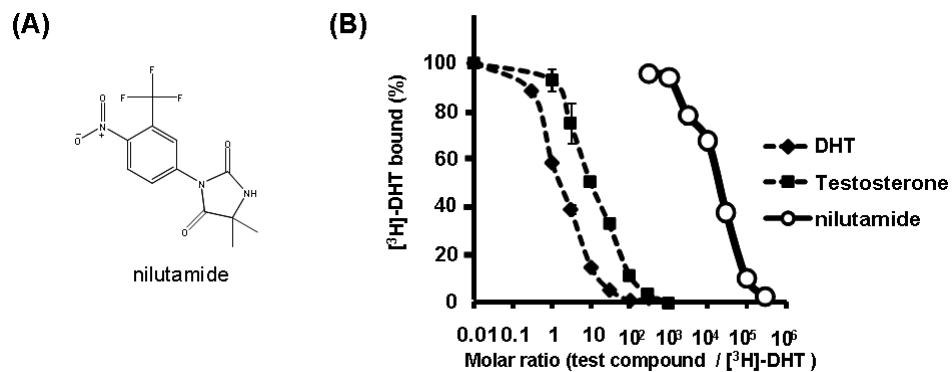

(A) chemical structure of nilutamide. (B) result of *in vitro* assay.

V. *In vitro* binding assay of spironolactone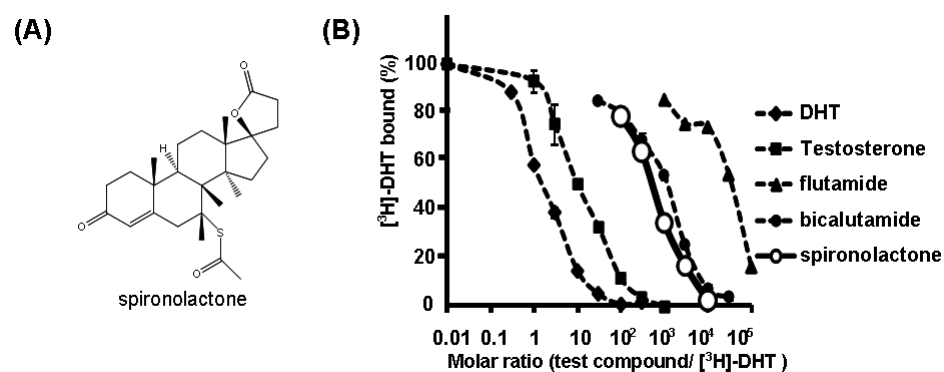

(A) chemical structure of spironolactone. (B) result of *in vitro* assay.

VI. *In vitro* binding assay of vitamin D3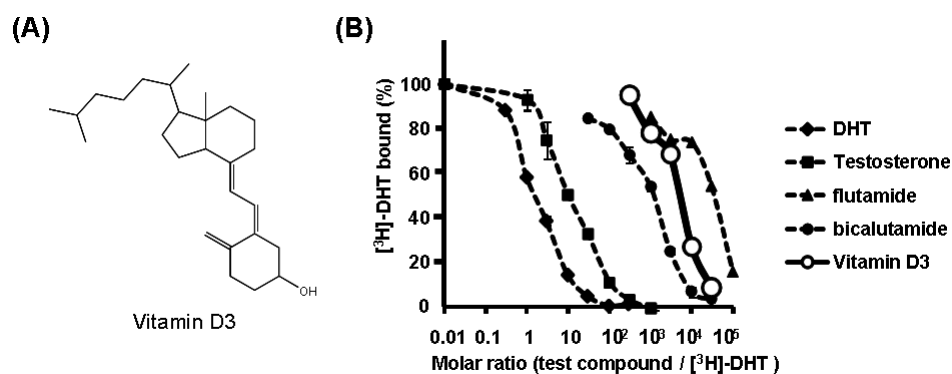

(A) chemical structure of vitamin D3. (B) result of *in vitro* assay.

VII. *In vitro* binding assay of ZINC 03849821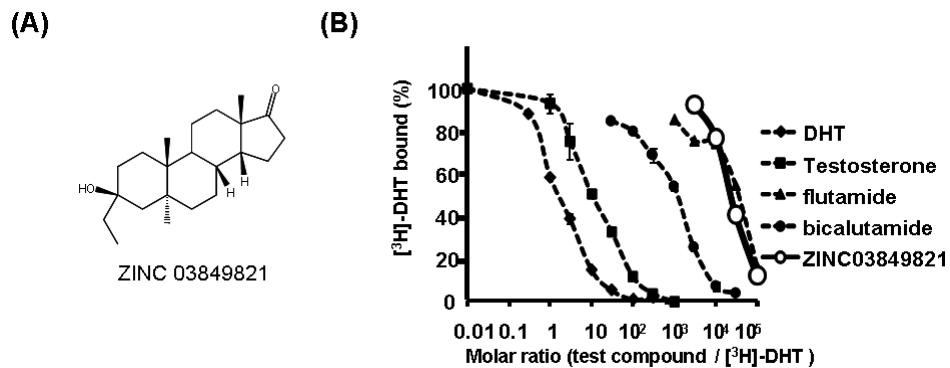

(A) chemical structure of ZINC 03849821. (B) result of *in vitro* assay.

VIII. *In vitro* binding assay of ZINC 04369595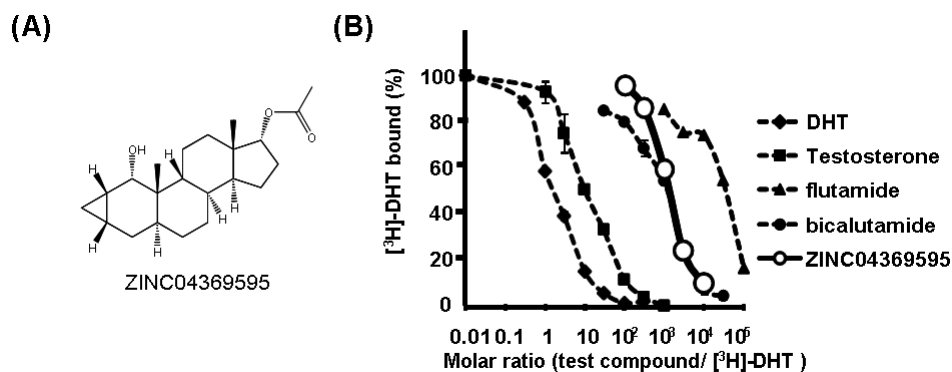

(A) chemical structure of ZINC 04369595. (B) result of *in vitro* assay.

IX. *In vitro* binding assay of fluanisone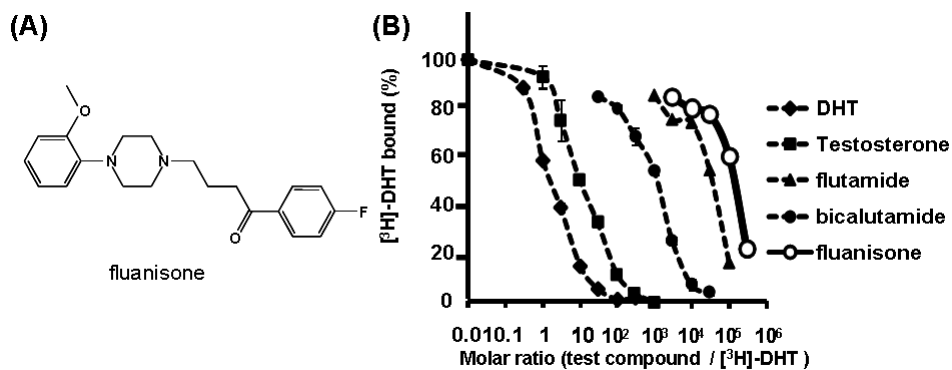

(A) chemical structure of fluanisone. (B) result of *in vitro* assay.

X. *In vitro* binding assay of ZINC 04026296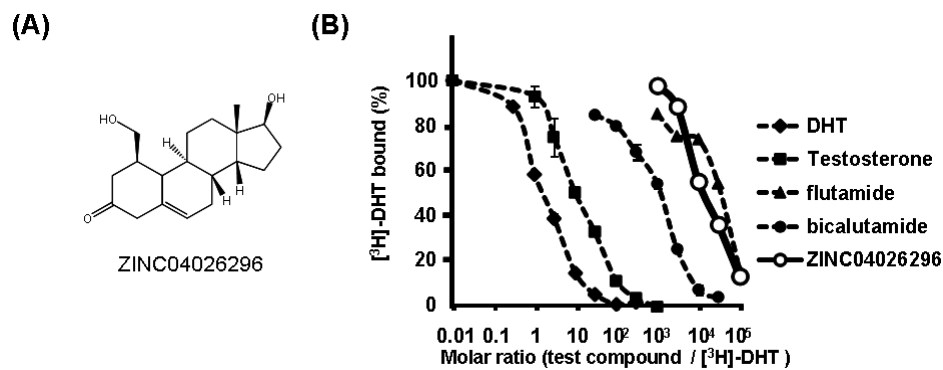(A) chemical structure of ZINC 04026296. (B) result of *in vitro* assay.XI. *In vitro* binding assay of 3-epiuzarigenin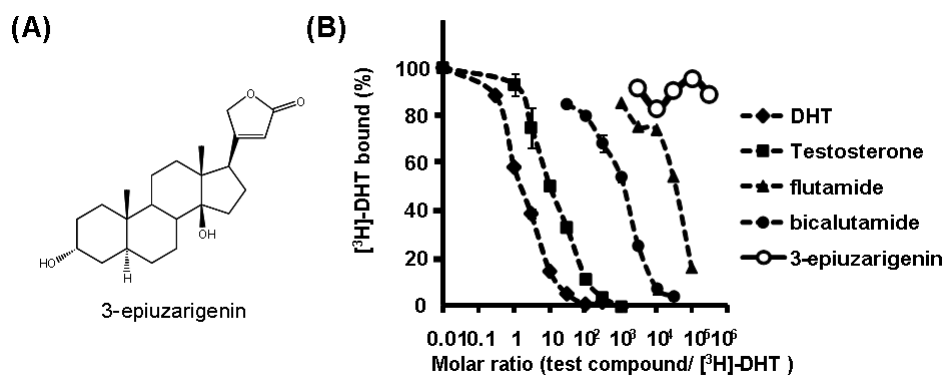(A) chemical structure of 3-epiuzarigenin. (B) result of *in vitro* assay.XII. *In vitro* binding assay of MDPI 1011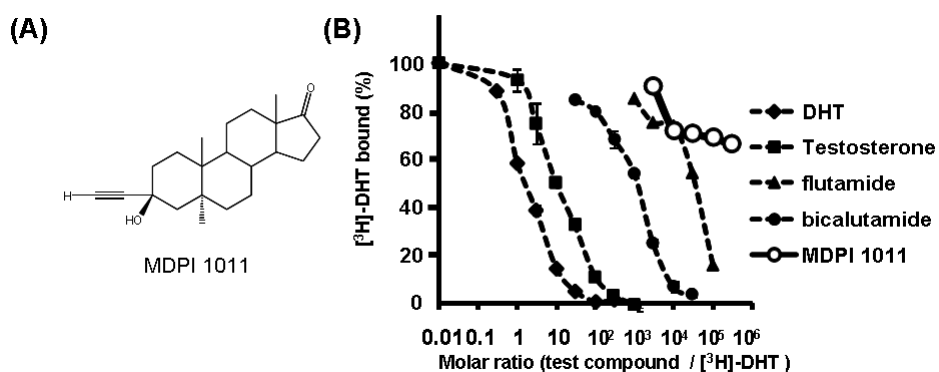(A) chemical structure of MDPI 1011. (B) result of *in vitro* assay.

XIII. *In vitro* binding assay of NSC 6129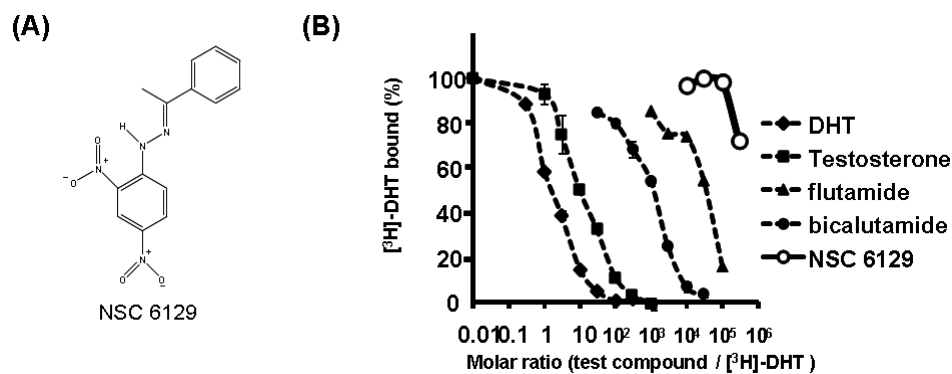

(A) chemical structure of NSC 6129. (B) result of *in vitro* assay.

XIV. *In vitro* binding assay of MDPI 944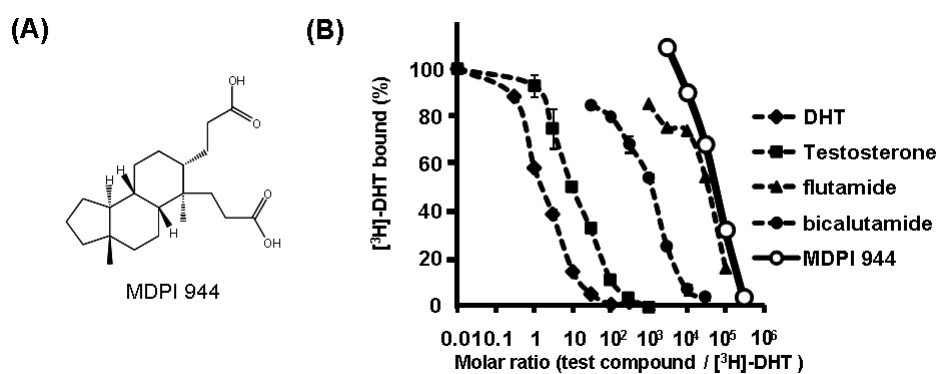

(A) chemical structure of MDPI 944. (B) result of *in vitro* assay.

XV. *In vitro* binding assay of P712100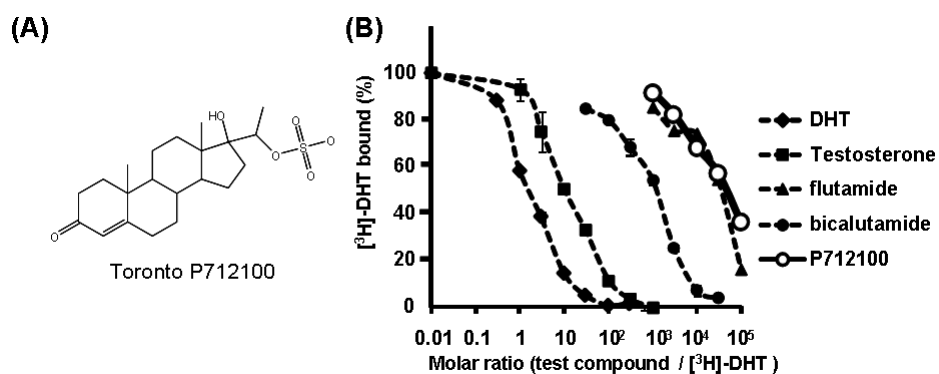

(A) chemical structure of P712100. (B) result of *in vitro* assay.

XVI. *In vitro* binding assay of methandriol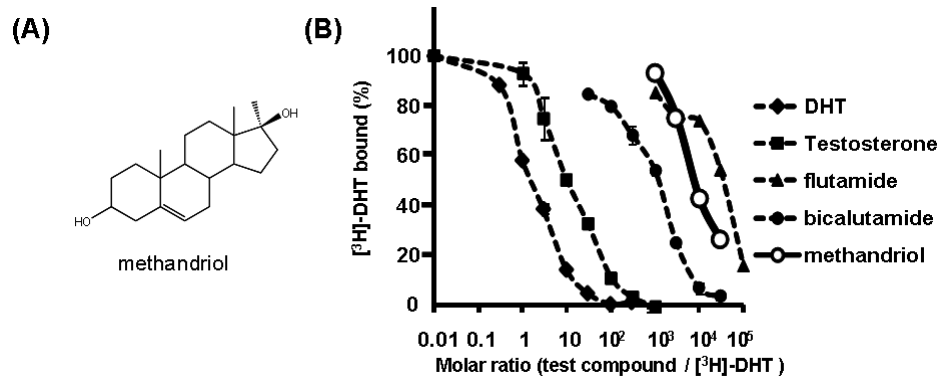

(A) chemical structure of methandriol. (B) result of *in vitro* assay.

XVII. *In vitro* binding assay of cortexolone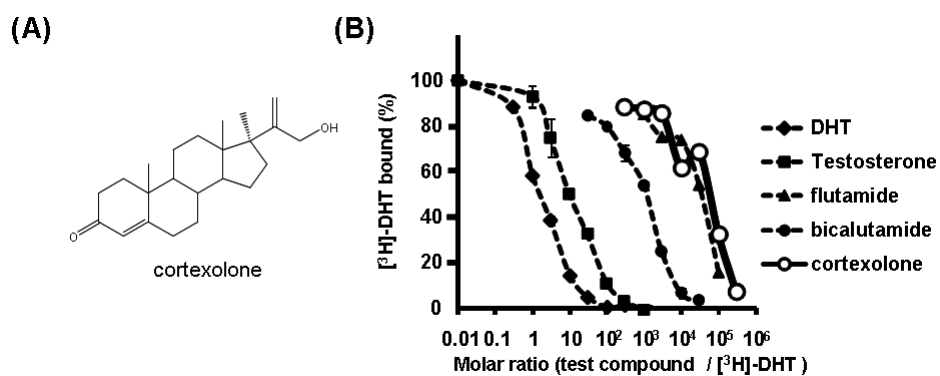

(A) chemical structure of cortexolone. (B) result of *in vitro* assay.

**(Second experimental verification)**XVIII. *In vitro* binding assay of DSHS00507SC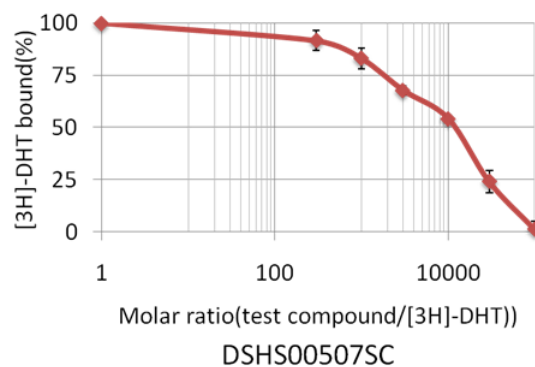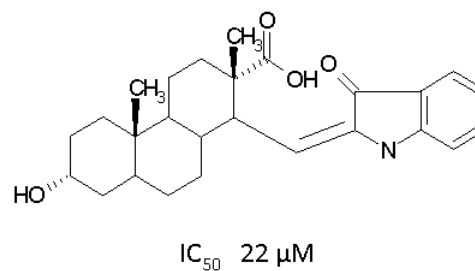XIX. *In vitro* binding assay of 4J-584S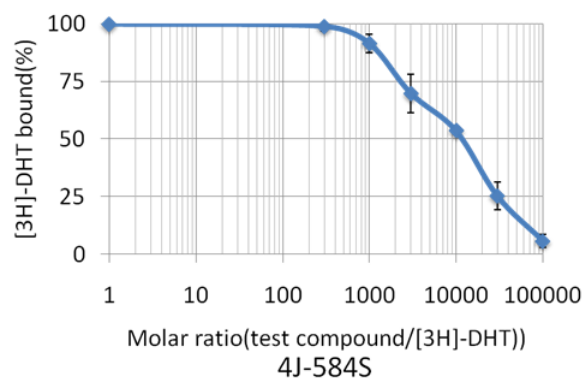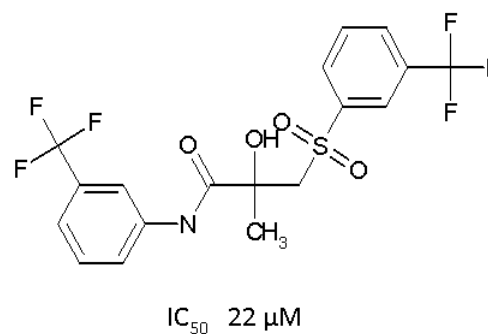XX. *In vitro* binding assay of T5853872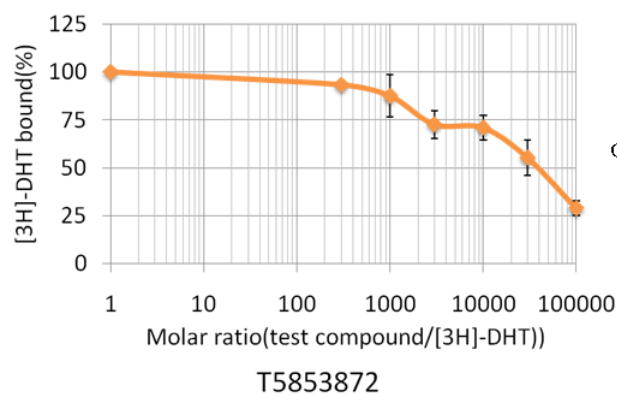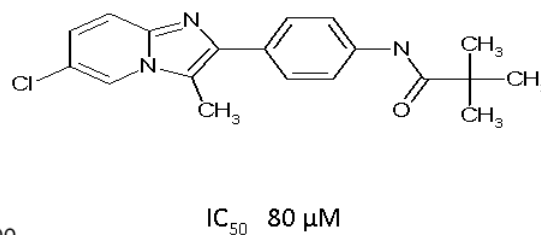

XXI. *In vitro* binding assay of BAS01279920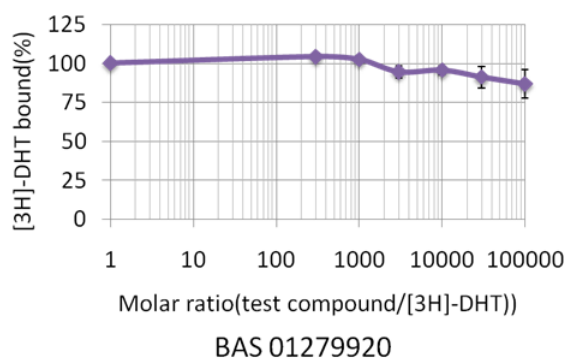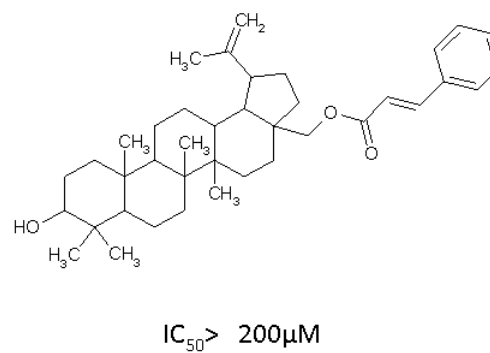XXII. *In vitro* binding assay of AN-652/43163258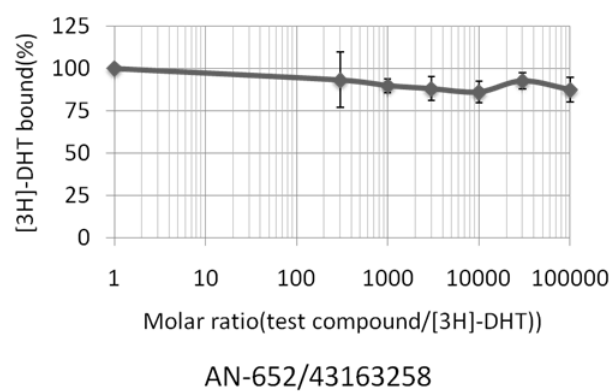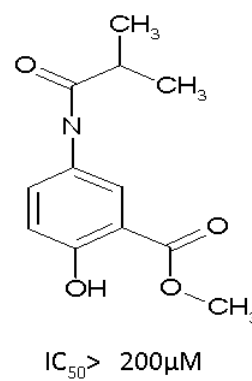Fig. S4 I-XXII: result of *in vitro* binding assay for each compound.
