# Supplementary material for: Integrating Statistical Predictions and Experimental Verifications for Enhancing Protein-Chemical Interaction Predictions in Virtual Screening
Source: PubMed Central journal article supplement (PMC2685987; doi:10.1371/journal.pcbi.1000397), 2009-06-05
Supplement: pcbi.1000397.s003.pdf [file pcbi.1000397.s003.pdf]

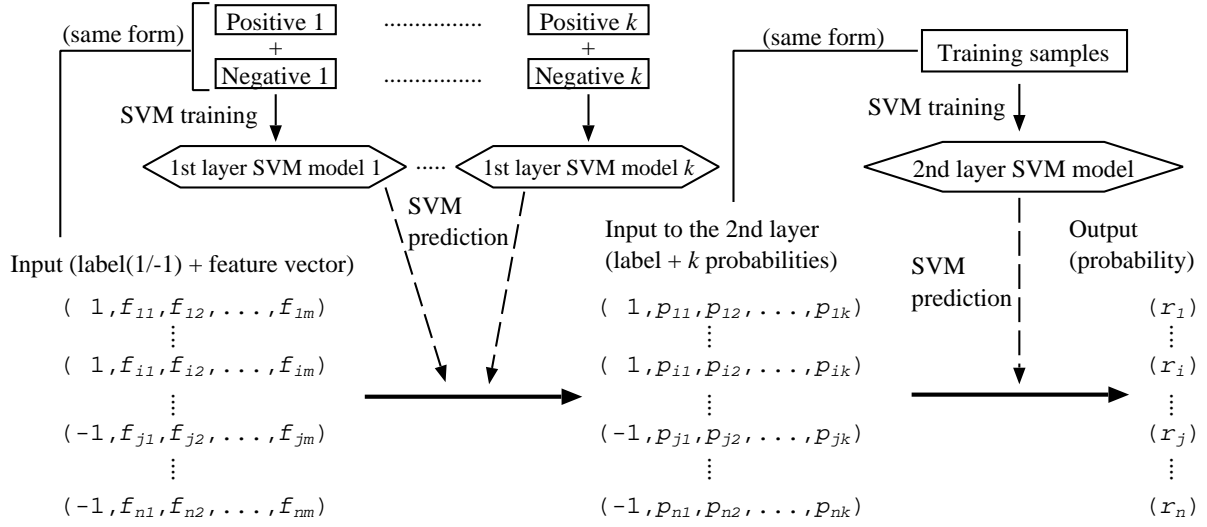

Fig. S1 Schematic illustration of the two-layer SVM system. It functions as follows.

1. Given  $\mathcal{X} = \{\mathbf{x}_1 = (f_{11}, f_{12}, \dots, f_{1l}), \mathbf{x}_2 = (f_{21}, f_{22}, \dots, f_{2l}), \dots, \mathbf{x}_n = (f_{n1}, f_{n2}, \dots, f_{nl})\}$ , where  $f_{ij}$  is the value for the  $j$ th dimension of the feature vector for the sample, or the protein-chemical pair  $i$ , which is expressed on the basis of Eqs (3) and (4) in Supplementary Materials.
2.  $k$  first-layer SVM models are applied to  $\mathcal{X}$  to produce  $\mathcal{P} = \{\mathbf{P}_1 = (p_{11}, p_{12}, \dots, p_{1k}), \mathbf{P}_2 = (p_{21}, p_{22}, \dots, p_{2k}), \dots, \mathbf{P}_n = (p_{n1}, p_{n2}, \dots, p_{nk})\}$ , where  $p_{ij}$  is the output of the first-layer SVM model  $j$  applied to the sample  $i$  and shows the possibility that  $i$  is positive and that is calculated on the basis of Eq. (2) in Supplementary Materials.
3. The second-layer SVM model is applied to  $\mathcal{P}$  to produce the final output  $\mathcal{R} = (r_1, r_2, \dots, r_n)$ , where  $r_i$  is the possibility that the sample  $i$  is positive.
