# Supplementary material for: Integrating Statistical Predictions and Experimental Verifications for Enhancing Protein-Chemical Interaction Predictions in Virtual Screening
Source: PubMed Central journal article supplement (PMC2685987; doi:10.1371/journal.pcbi.1000397), 2009-06-05
Supplement: pcbi.1000397.s004.pdf [file pcbi.1000397.s004.pdf]

(A) Nuclear Receptor

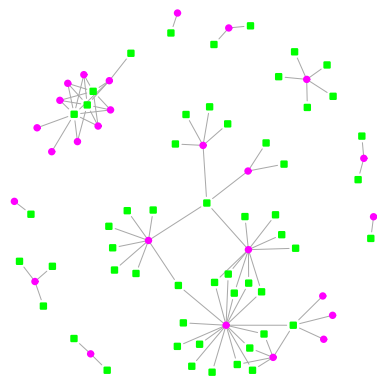

(B) GPCR

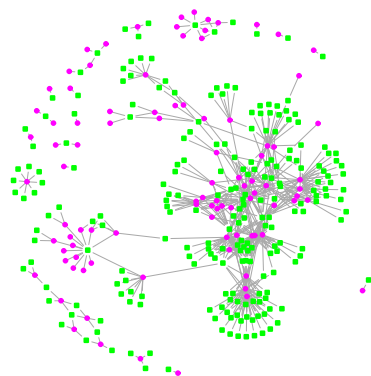

(C) Ion Channel

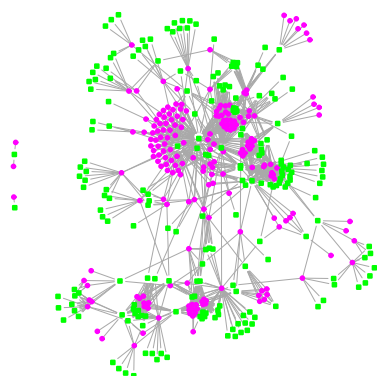

(D) Enzyme

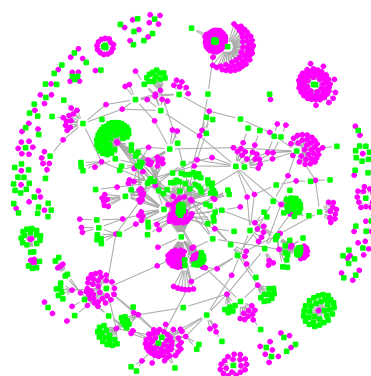

(E) All

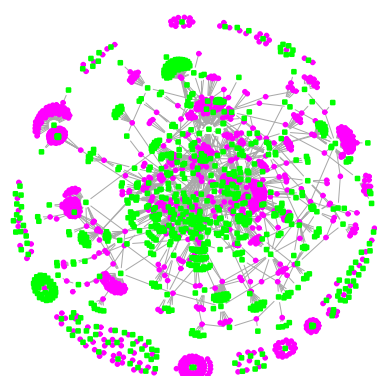

(F) DrugBank

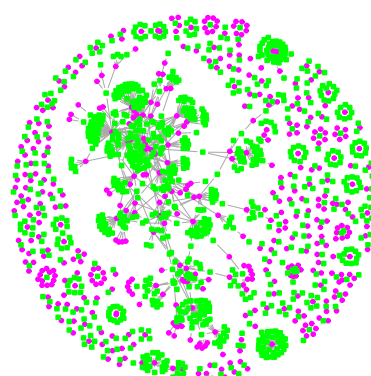

Fig. S2 Protein-drug interaction network for several datasets. A magenta circle represents a protein and a green square corresponds to a chemical compound. A gray edge means that a drug binds to a protein.
