# Supplementary material for: Integrating Statistical Predictions and Experimental Verifications for Enhancing Protein-Chemical Interaction Predictions in Virtual Screening
Source: PubMed Central journal article supplement (PMC2685987; doi:10.1371/journal.pcbi.1000397), 2009-06-05
Supplement: pcbi.1000397.s008.pdf [file pcbi.1000397.s008.pdf]

Table S1 Prediction performances in several datasets

| dataset          | Reference                                       | # of proteins | # of drugs | # of positives | # of negatives |
|------------------|-------------------------------------------------|---------------|------------|----------------|----------------|
| DrugBank         | Suppl. Fig. S2F, Wishart <i>et al.</i> , 2008   | 456           | 964        | 1731           | 3500           |
| Nuclear Receptor | Suppl. Fig. S2A, Yamanishi <i>et al.</i> , 2008 | 26            | 54         | 90             | 200            |
| GPCR             | Suppl. Fig. S2B, Yamanishi <i>et al.</i> , 2008 | 95            | 223        | 635            | 1300           |
| Ion Channel      | Suppl. Fig. S2C, Yamanishi <i>et al.</i> , 2008 | 204           | 210        | 1476           | 3000           |
| Enzyme           | Suppl. Fig. S2D, Yamanishi <i>et al.</i> , 2008 | 664           | 445        | 2926           | 5900           |
| All              | Suppl. Fig. S2E, Yamanishi <i>et al.</i> , 2008 | 989           | 791        | 5127           | 10300          |

  

| dataset          | <sup>1</sup> AUC | <sup>2</sup> sensitivity (%) | <sup>3</sup> precision (%) | <sup>4</sup> specificity (%) | <sup>5</sup> accuracy (%) |
|------------------|------------------|------------------------------|----------------------------|------------------------------|---------------------------|
| DrugBank         | 0.882            | 70.1                         | 82.2                       | 92.5                         | 85.1                      |
| Nuclear Receptor | 0.862            | 54.4                         | 77.8                       | 93.0                         | 81.0                      |
| GPCR             | 0.906            | 75.3                         | 81.6                       | 91.7                         | 86.3                      |
| Ion Channel      | 0.943            | 85.3                         | 85.9                       | 93.1                         | 90.5                      |
| Enzyme           | 0.951            | 84.2                         | 88.3                       | 94.5                         | 91.1                      |
| All              | 0.956            | 85.2                         | 88.3                       | 94.4                         | 91.3                      |

  

| dataset          | *AUC  | *sensitivity (%) | *precision (%) | *specificity (%) | *accuracy (%) |
|------------------|-------|------------------|----------------|------------------|---------------|
| DrugBank         | 0.877 | 72.3             | 78.6           | 90.3             | 84.3          |
| Nuclear Receptor | 0.841 | 57.8             | 70.3           | 89.0             | 79.3          |
| GPCR             | 0.893 | 73.4             | 77.8           | 89.8             | 84.4          |
| Ion Channel      | 0.931 | 83.3             | 82.2           | 91.1             | 88.6          |
| Enzyme           | 0.943 | 83.1             | 85.2           | 92.8             | 89.6          |
| All              | 0.948 | 84.0             | 85.5           | 92.9             | 90.0          |

<sup>1</sup>: area under the ROC curve.

<sup>2</sup>: sensitivity =  $TP/(TP + FN)$ .

<sup>3</sup>: precision =  $TP/(TP + FP)$ .

<sup>4</sup>: specificity =  $TN/(TN + FP)$ .

<sup>5</sup>: accuracy =  $(TP + TN)/(TP + FN + TN + FP)$ .

( $TP$ : a number of known positives predicted as positive.  $FP$ : a number of negatives predicted as positive.  $FN$ : a number of known positives predicted as negative.  $TN$ : a number of negatives predicted as negative.)

\*: RBF kernel was applied to the feature vector concatenating that of protein and that of chemical compound. The results suggest that consideration of combination effects (Eq.(5) in Supplementary Materials) generally improves prediction performances.

## References

- D.S. Wishart, C. Knox, A.C. Guo, D. Cheng, S. Shrivastava, D. Tzur, B. Gautam, and M. Hassanali. DrugBank: a knowledgebase for drugs, drug actions and drug targets. *Nucleic Acids Res.*, pages D901–D906, 2008.
- Y. Yamanishi, M. Araki, A. Gutteridge, W. Honda, and M. Kanehisa. Prediction of drug-target interaction networks from the integration of chemical and genomic spaces. *Bioinformatics*, pages i232–240, 2008.
