# Supplementary material for: Integrating Statistical Predictions and Experimental Verifications for Enhancing Protein-Chemical Interaction Predictions in Virtual Screening
Source: PubMed Central journal article supplement (PMC2685987; doi:10.1371/journal.pcbi.1000397), 2009-06-05
Supplement: pcbi.1000397.s010.pdf [file pcbi.1000397.s010.pdf]

Table S3 Prediction performances on different designed negatives

| <sup>1</sup> dataset type | <sup>2</sup> sensitivity(%) | <sup>3</sup> precision (%) | <sup>4</sup> accuracy (%) | <sup>5</sup> AUC | <sup>6</sup> MCC |
|---------------------------|-----------------------------|----------------------------|---------------------------|------------------|------------------|
| <i>min</i>                | 94.51                       | 96.69                      | 99.42                     | 0.9916           | 0.9521           |
| <i>mlt</i>                | 88.68                       | 96.42                      | 99.04                     | 0.9941           | 0.9189           |
| <i>mle</i>                | 89.08                       | 96.01                      | 99.04                     | 0.9948           | 0.9192           |
| <i>max</i>                | 80.47                       | 88.05                      | 97.99                     | 0.9831           | 0.8329           |

<sup>1</sup>: refers to negative data expansion rules described in Sec. 1.3 in Supplementary Materials. 10 *subpos* first-layer SVM models were utilized to produce the two-layer SVM model from datasets with 24,500 negatives.

<sup>2</sup>:  $\text{sensitivity} = TP / (TP + FN)$ .

<sup>3</sup>:  $\text{precision} = TP / (TP + FP)$ .

<sup>4</sup>:  $\text{accuracy} = (TP + TN) / (TP + FN + TN + FP)$ .

<sup>5</sup>: area under the ROC curve.

<sup>6</sup>:  $(TP \times TN - FP \times FN) / \sqrt{(TP + FN) \times (TN + FP) \times (TP + FP) \times (TN + FN)}$ .

(*TP*: a number of known positives predicted as positive. *FP*: a number of negatives predicted as positive. *FN*: a number of known positives predicted as negative. *TN*: a number of negatives predicted as negative.)
