# Supplementary material for: Integrating Statistical Predictions and Experimental Verifications for Enhancing Protein-Chemical Interaction Predictions in Virtual Screening
Source: PubMed Central journal article supplement (PMC2685987; doi:10.1371/journal.pcbi.1000397), 2009-06-05
Supplement: pcbi.1000397.s011.pdf [file pcbi.1000397.s011.pdf]

Table S4 Evaluation of our prediction method on an external test set

| 2 Model type                           | 1 Internal 10-fold cross-validation |              |              | 1 External prediction |              |              |
|----------------------------------------|-------------------------------------|--------------|--------------|-----------------------|--------------|--------------|
|                                        | 3 prec.(%)                          | 4 sens.(%)   | 5 acc.(%)    | prec.(%)              | sens.(%)     | acc.(%)      |
| (A) Effect of rational negative design |                                     |              |              |                       |              |              |
| one-layer                              | 71.76                               | 42.99        | 95.11        | 64.66                 | 50.59        | 95.00        |
| one-layer <sub>r</sub>                 | 82.38(±0.64)                        | 38.22(±0.95) | 95.38(±0.06) | 40.68(±1.19)          | 50.00(±1.87) | 92.02(±0.28) |
| (B) Effect of second-layer SVM model   |                                     |              |              |                       |              |              |
| subpos                                 | 97.11                               | 92.57        | 99.33        | 82.81                 | 31.18        | 95.11        |
| subpos <sub>r</sub>                    | 94.40(±0.67)                        | 96.46(±1.00) | 99.39(±0.11) | 42.5(±2.71)           | 33.53(±3.90) | 92.74(±0.41) |
| subpos <sub>v0.5</sub>                 | —                                   | —            | —            | 8.89                  | 57.06        | 59.27        |
| subpos <sub>v0.8</sub>                 | —                                   | —            | —            | 28.13                 | 5.29         | 92.98        |
| subpos <sub>m0.5</sub>                 | —                                   | —            | —            | 9.52                  | 58.24        | 61.37        |
| subpos <sub>m0.8</sub>                 | —                                   | —            | —            | 17.86                 | 2.94         | 92.82        |
| subpos <sub>ann</sub>                  | 95.98                               | 93.21        | 99.29        | 75.81                 | 27.65        | 94.73        |
| subpos <sub>qda</sub>                  | 70.69                               | 54.39        | 95.49        | 34.52                 | 17.06        | 92.52        |
| subpos <sub>f</sub>                    | 95.66(±0.32)                        | 78.33(±1.60) | 98.33(±0.10) | 78.76(±2.86)          | 25.59(±1.09) | 94.71(±0.09) |
| (C) Improvement of precision           |                                     |              |              |                       |              |              |
| allpos                                 | 99.68                               | 100.00       | 99.98        | 100.00                | 10.59        | 94.20        |
| subpos <sub>[0.9]</sub>                | —                                   | —            | —            | 90.70                 | 22.94        | 94.85        |
| subpos <sub>[0.95]</sub>               | —                                   | —            | —            | 92.50                 | 21.76        | 94.81        |
| one-layer <sub>[0.9]</sub>             | —                                   | —            | —            | 86.67                 | 15.29        | 94.35        |
| one layer <sub>[0.95]</sub>            | —                                   | —            | —            | 71.43                 | 2.941        | 93.63        |

1: The external dataset consisted of 170 positives and 2,450 negatives that were randomly chosen from 1,731 positives and 24,500 designed negatives with the *mlt* rule described in Sec. 1.3 in Supplementary Materials and that were excluded in constructing first-layer and second-layer SVM models. Here, “one layer” SVM model was produced based on the same features as used for the first-layer SVM model. The internal dataset utilized 1,561 positives and 22,050 negatives.

2: “Model type” exhibits that the one-layer SVM model or the second-layer SVM model, specified by the type of first-layer SVM model, was utilized. Subscripts mean as follows.

- <sub>r</sub> means that three types of randomly chosen 22,050 pairs of protein and chemical compound were used instead of designed negatives to construct the SVM model. The 95% confidence intervals are shown.
- <sub>v<sub>t</sub></sub> means that voting with 11 first-layer SVM models with threshold *t* was used for prediction.

$$pred_{v_t} = \begin{cases} \text{pos.} & \text{if } \sum_{i=1}^{11} r_i \geq 6 \\ \text{neg.} & \text{otherwise} \end{cases}, r_i = \begin{cases} 1 & \text{if (probability output of model } i) \geq t \\ 0 & \text{otherwise} \end{cases}$$

- <sub>m<sub>t</sub></sub> means that average of outputs of 11 first-layer SVM models was used for prediction with threshold *t*.

$$pred_{m_t} = \begin{cases} \text{pos.} & \text{if } \sum_{i=1}^{11} \frac{(\text{probability output of model } i)}{11} \geq t \\ \text{neg.} & \text{otherwise} \end{cases}$$

- <sub>ann</sub> means that Artificial Neural Network (ann) (implemented by the statistical software package R (<http://cran.r-project.org/>) function *nnet* (Venables and Ripley, 2002)) was applied to outputs of 11 first-layer SVM models. Parameters were selected to give the best accuracy in the internal 10-fold cross validation. For example, 17 units were used in the hidden layer.
- <sub>qda</sub> means that Quadratic Discriminant Analysis (qda) (implemented by R function *qda* (Venables and Ripley, 2002)) was applied to outputs of 11 first-layer SVM models.
- <sub>f</sub> means that twenty types of randomly chosen 11 first-layer SVM models were used to construct the second-layer SVM model. The 95% confidence intervals are shown.
- <sub>[<sub>t</sub>]</sub> (e.g. *t* = 0.9) means that final probability outputs were evaluated with threshold *t*.

3: precision (prec.) =  $TP/(TP + FP)$ .

4: sensitivity (sens.) =  $TP/(TP + FN)$ .

5: accuracy (acc.) =  $(TP + TN)/(TP + FN + TN + FP)$ .

(*TP*: a number of known positives predicted as positive. *FP*: a number of negatives predicted as positive. *FN*: a number of known positives predicted as negative. *TN*: a number of negatives predicted as negative.)

## References

W. N. Venables and B. D. Ripley. *Modern Applied Statistics with S*. Springer, New York, fourth edition, 2002. URL <http://www.stats.ox.ac.uk/pub/MASS4>. ISBN 0-387-95457-0.
