# Supplementary material for: Integrating Statistical Predictions and Experimental Verifications for Enhancing Protein-Chemical Interaction Predictions in Virtual Screening
Source: PubMed Central journal article supplement (PMC2685987; doi:10.1371/journal.pcbi.1000397), 2009-06-05
Supplement: pcbi.1000397.s013.pdf [file pcbi.1000397.s013.pdf]

Table S7 Overlaps of predictions between prediction models in Table S5

| (A) threshold= 0.5         |      |      |      |       |     |
|----------------------------|------|------|------|-------|-----|
|                            | 1.   | 2.   | 3.   | 4.    | 5.  |
| 1. <sup>1</sup> similarity | 5265 | 1161 | 1145 | 654   | 354 |
| 2. only compound           | —    | 3269 | 2007 | 658   | 345 |
| 3. <sup>2</sup> one-layer  | —    | —    | 3309 | † 895 | 388 |
| 4. <sup>3</sup> subpos     | —    | —    | —    | 1163  | 309 |
| 5. <sup>4</sup> allpos     | —    | —    | —    | —     | 388 |

  

| (B) threshold= 0.95 |      |     |     |     |     |
|---------------------|------|-----|-----|-----|-----|
|                     | 1.   | 2.  | 3.  | 4.  | 5.  |
| 1. similarity       | 5265 | 359 | 260 | 337 | 253 |
| 2. only compound    | —    | 456 | 171 | 200 | 176 |
| 3. one-layer        | —    | —   | 268 | 175 | 200 |
| 4. subpos           | —    | —   | —   | 428 | 179 |
| 5. allpos           | —    | —   | —   | —   | 265 |

†: There were 895 compounds common between 3,309 compounds predicted by the one-layer SVM model and 1,163 obtained by the *subpos* two-layer SVM model.

<sup>1</sup>: A chemical compound  $i$  is predicted as a binding ligand of a protein  $\alpha$  by the similarity method if

$$pred_{sim}(i) = \max_{j \in A} \frac{|I \cap J|}{|I \cup J|} \geq 0.9,$$

where  $A$  is known binding ligands of the protein  $\alpha$ , and  $I$  (or  $J$ ) is a set of substructures in  $\mathcal{P}_2^6(i)$  (or  $\mathcal{P}_2^6(j)$ ) described in Eq. (4) in Supplementary Materials.

<sup>2</sup>: one-layer SVM using the *mlt* dataset with 28,000 negatives.

<sup>3</sup>: two-layer SVM using 10 *subpos* first-layer SVM models and the *mlt* dataset with 24,500 negatives.

<sup>4</sup>: two-layer SVM using 9 *allpos* first-layer SVM models and the *max* dataset with 28,000 negatives.

\*: details of *mlt* and *max* datasets are provided in Sec. 1.3 in Supplementary Materials.
