# Supplementary material for: Integrating Statistical Predictions and Experimental Verifications for Enhancing Protein-Chemical Interaction Predictions in Virtual Screening
Source: PLoS Comput Biol. 2009 Jun 5;5(6):e1000397. doi: 10.1371/journal.pcbi.1000397 (PMC2685987; doi:10.1371/journal.pcbi.1000397)
Supplement: Text S1 — Supplementary Methods and Supplementary Results are provided. (0.13 MB PDF) [file pcbi.1000397.s001.pdf]

Table S5 Evaluation of our method with respect to comprehensive interaction prediction

| <sup>1</sup> dataset               | <sup>2</sup> neg. | <sup>3</sup> firsts | <sup>4</sup> P10275 | <sup>4</sup> P11229 | <sup>4</sup> P35367 | <sup>5</sup> rec <sub>0.5</sub> (%) | <sup>5</sup> rec <sub>0.95</sub> (%) | <sup>6</sup> evaluation |
|------------------------------------|-------------------|---------------------|---------------------|---------------------|---------------------|-------------------------------------|--------------------------------------|-------------------------|
| (A) one-layer SVM                  |                   |                     |                     |                     |                     |                                     |                                      |                         |
| <i>mlt</i>                         | 16                | —                   | 714                 | 1408                | 1187                | 100                                 | 98.97                                | 82.50                   |
| <i>mlt</i>                         | 14                | —                   | 709                 | 1820                | 1634                | 100                                 | *97.94                               | *79.02                  |
| <i>max</i>                         | 16                | —                   | 4073                | 5956                | 6964                | 82.47                               | *56.70                               | *47.51                  |
| random                             | 14                | —                   | 1896.7(±53.6)       | 10627.3(±648.9)     | 10204.0(±640.7)     | 100                                 | 99.66(±1.09)                         | 69.20(±0.57)            |
| random                             | 16                | —                   | 1869.3(±136.1)      | 10503.3(±1250.7)    | 9305.3(±517.8)      | 100                                 | 99.66(±1.09)                         | 69.45(±0.32)            |
| (B) two-layer SVM- <i>subpos</i>   |                   |                     |                     |                     |                     |                                     |                                      |                         |
| <i>mlt</i>                         | 14                | 10                  | 177                 | 535                 | 451                 | 96.91                               | 93.81                                | 75.56                   |
| <i>mlt</i>                         | 14                | 11                  | 205                 | 671                 | 491                 | 96.91                               | 91.75                                | 73.54                   |
| <i>mlt</i>                         | 14                | 9                   | 239                 | 513                 | 403                 | 95.88                               | 91.75                                | 73.87                   |
| <i>mlt</i>                         | 14                | 8                   | 290                 | 456                 | 363                 | 88.66                               | 82.47                                | 66.58                   |
| <i>mlt</i>                         | 12                | 10                  | 224                 | 561                 | 612                 | 95.88                               | 92.78                                | 73.25                   |
| <i>mlt</i>                         | 16                | 10                  | 162                 | 466                 | 415                 | 94.85                               | 89.69                                | 73.47                   |
| <i>min</i>                         | 14                | 10                  | 2525                | 6098                | 3326                | 97.94                               | 96.91                                | 69.52                   |
| <i>mle</i>                         | 14                | 10                  | 168                 | 526                 | 599                 | 97.94                               | 92.78                                | 74.79                   |
| <i>max</i>                         | 14                | 10                  | 32                  | 386                 | 191                 | 92.78                               | *85.57                               | *72.27                  |
| random                             | 14                | 10                  | 848.3(±345.0)       | 1531.7(±628.9)      | 988.0(±411.4)       | 96.56(±2.89)                        | 81.10(±19.44)                        | 66.44(±7.82)            |
| (C) two-layer SVM- <i>allpos</i>   |                   |                     |                     |                     |                     |                                     |                                      |                         |
| <i>max</i>                         | 16                | 9                   | 28                  | 231                 | 129                 | 100                                 | 97.94                                | 82.92                   |
| <i>max</i>                         | 16                | 10                  | 29                  | 238                 | 131                 | 100                                 | 98.97                                | 82.73                   |
| <i>max</i>                         | 16                | 8                   | 29                  | 243                 | 133                 | 100                                 | 96.91                                | 82.09                   |
| <i>max</i>                         | 14                | 9                   | 29                  | 243                 | 129                 | 100                                 | 96.91                                | 82.00                   |
| <i>mle</i>                         | 16                | 9                   | 28                  | 267                 | 140                 | 100                                 | 100                                  | 80.99                   |
| <i>mlt</i>                         | 16                | 9                   | 67                  | 248                 | 141                 | 100                                 | 100                                  | 80.72                   |
| random                             | 16                | 9                   | 74.7(±42.6)         | 255.3(±32.2)        | 146.7(±8.3)         | 100                                 | 100                                  | 80.67(±0.93)            |
| (D) only compound SVM <sup>7</sup> |                   |                     |                     |                     |                     |                                     |                                      |                         |
| —                                  | —                 | —                   | 640                 | 1791                | 838                 | 86.60                               | 71.13                                | 59.66                   |
| (E) similarity search <sup>8</sup> |                   |                     |                     |                     |                     |                                     |                                      |                         |
| —                                  | —                 | —                   | 1869                | 1816                | 1580                | —                                   | —                                    | —                       |

<sup>1</sup> refers to negative data expansion rules (details are provided in Sec. 1.3 in Supplementary Materials). “random” indicates that three types of random pairs comprising a protein and a drug are used as negatives. The 95% confidence intervals are shown.

<sup>2</sup>: the number of negatives (= 1,750×*x*).

<sup>3</sup>: the number of the first-layer SVM models utilized for the construction of the second-layer SVM model.

<sup>4</sup>: target proteins whose ligands were predicted on the basis of 109,841 compounds. The number of predicted binding compounds is shown.

<sup>5</sup>: rec<sub>*x*</sub> is the recall rate (=TP/(TP+FN)) at the threshold *x*, ranging from 0 to 1. 0.5 is the threshold following the definition of SVM. TP: true positives, FN: false negatives.

<sup>6</sup>:

$$\text{evaluation} = 100 \times \left( \frac{1}{2} \left[ \text{rec}_{0.5} + \frac{\text{rec}_{0.95} + \text{prec}_{0.95}}{2\{1 + (1 - \text{rec}_{0.95})(1 - \text{prec}_{0.95})\}} \right] - \frac{\text{total \# of predicted positives} - \text{\# of known positives}}{\text{total \# of prediction targets} - \text{\# of known positives}} \right)$$

Here, prec<sub>*x*</sub> is the precision (=TP/(TP+FP)) at the threshold *x*. FP: false positives.

<sup>7</sup>: SVM model in which chemical compounds binding to each target protein were treated as positives and all other compounds in the DrugBank dataset were regarded as negatives.

<sup>8</sup>: A chemical compound *i* was predicted as a binding ligand of a protein  $\alpha$  by using the similarity method if  $\text{pred}_{\text{sim}}(i) = \max_{j \in A} |I \cap J| / |I \cup J| \geq 0.9$ , where *A* represents the known binding ligands of the protein  $\alpha$ , and *I* (or *J*) represents a set of substructures considered in calculating the feature vector of the chemical compounds.

\*: the threshold was set to 0.9 instead of 0.95 for the calculation of “evaluation”.
